# Supplementary material
Source: publisher figshare collection journal article supplement (https://sage.figshare.com/ndownloader/files/16258946)
Supplement: Supplementary file 1 [file 16258946]

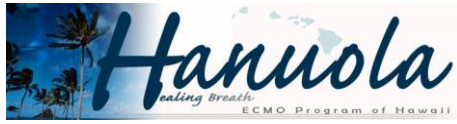

## ECMOjo Validation Site Questionnaire

### Team

1. Who primes your circuit?
2. Who sits by the pump during the runs?
3. Who manages the ECMO patients?

### Circuit

1. What equipment do you use?
  - a. Pump
  - b. Oxygenator
2. Do you use different set ups for different age categories?
3. Does your circuit include:
  - a. Bridge (type?)
  - b. Bladder (type?)
  - c. Bubble detector
  - d. Flow Transducer?
  - e. Arterial filter?
4. How and where do you measure your pressures?
5. Do you give your medications to the patient or circuit?
6. Where do you infuse your drips?
7. Where are your sampling ports?
8. Do you use pigtails or stopcocks?
9. Could you send a picture of your circuit and setup?

### Support

1. Do you have a standard wet lab exercises? Would you share them with us?
2. Would you be willing to incorporate our four test scenarios into your wet lab?
3. Could you assist us with wet lab testing?
